# Supplementary material for: Towards increased accuracy and reproducibility in SARS-CoV-2 next generation sequence analysis for public health surveillance
Source: PubMed Central journal article supplement (PMC9645426; doi:10.1101/2022.11.03.515010), 2022-11-03

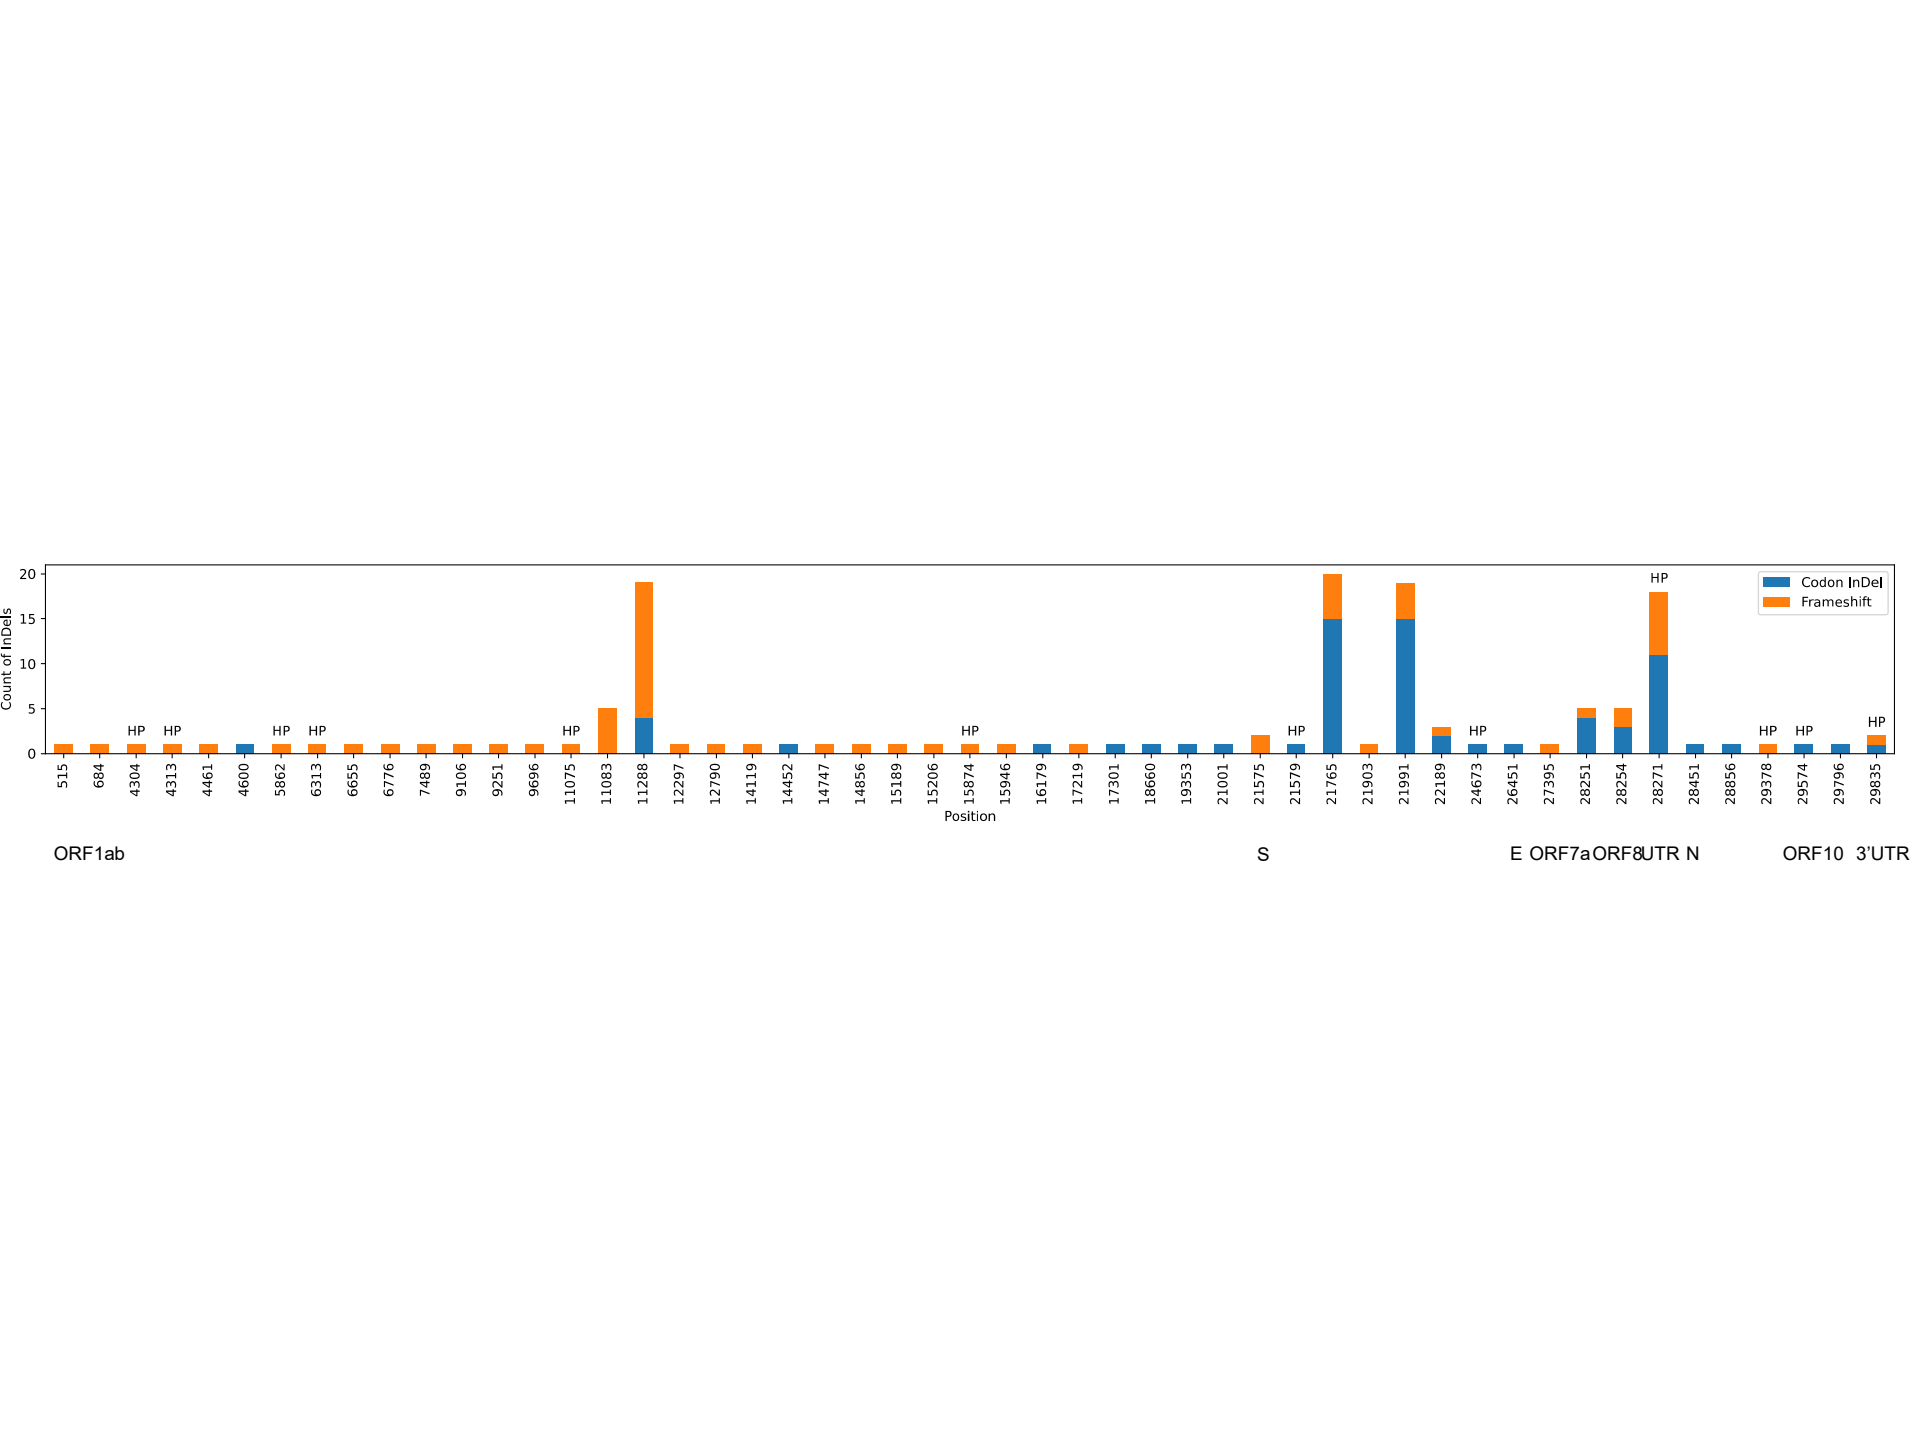

Supplement: media-2.pdf [file media-2.pdf]
