# Supplementary material for: Towards increased accuracy and reproducibility in SARS-CoV-2 next generation sequence analysis for public health surveillance
Source: PubMed Central journal article supplement (PMC9645426; doi:10.1101/2022.11.03.515010), 2022-11-03

**A**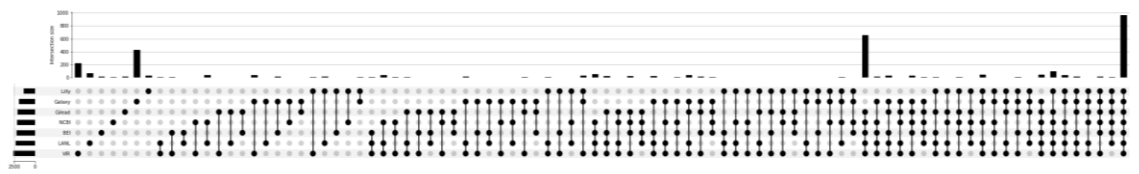**B**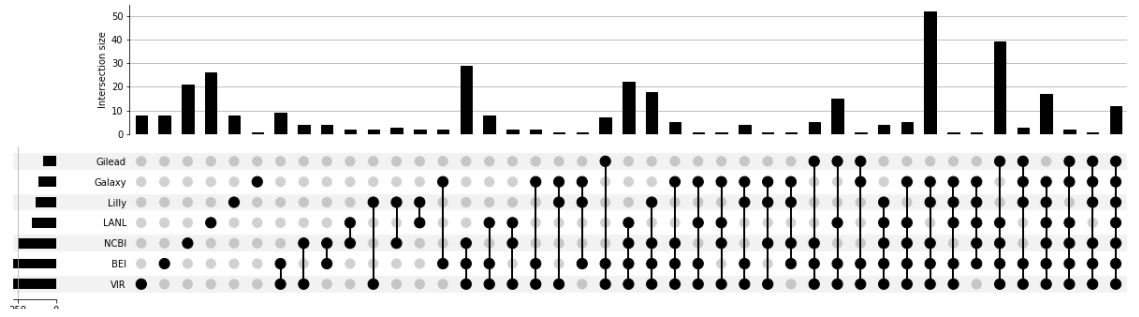**C**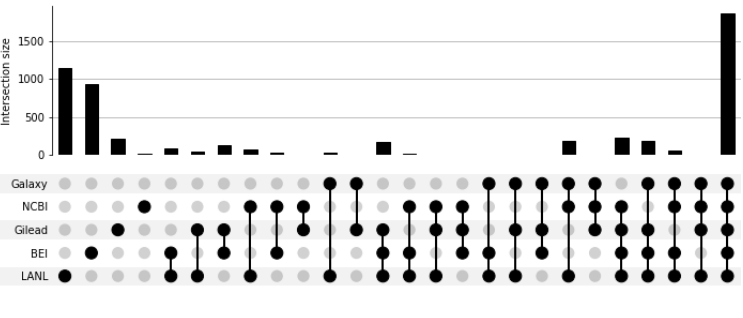**D**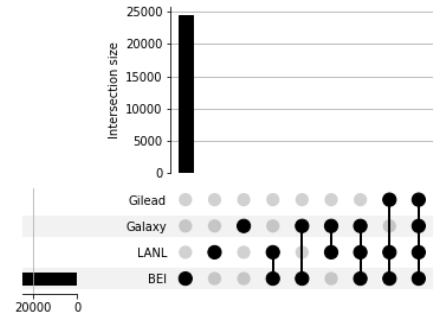**E**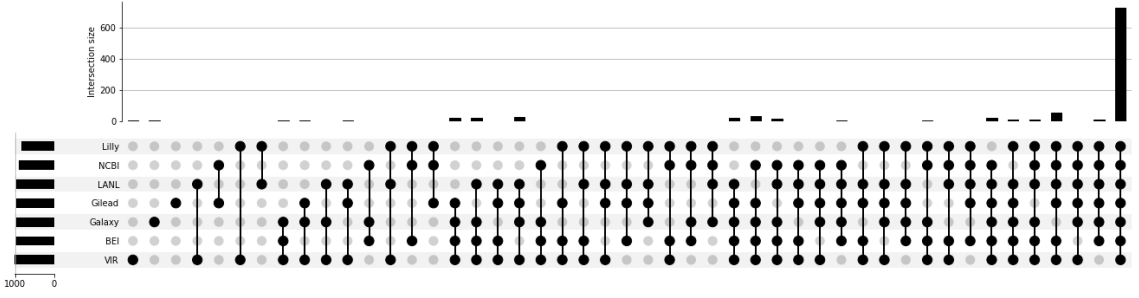**F**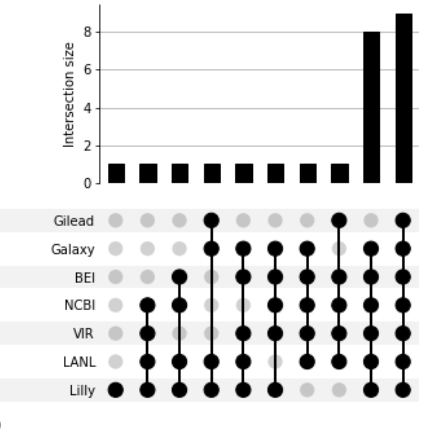**G**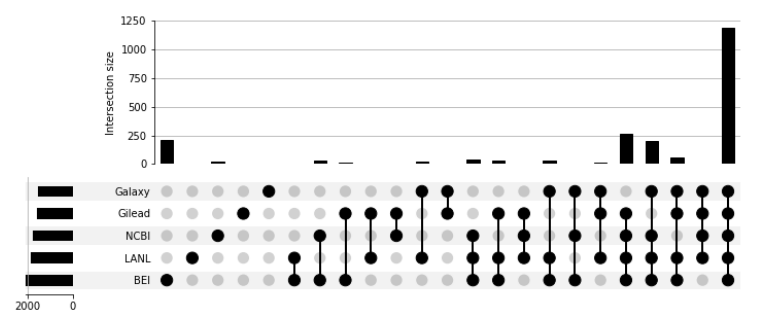**H**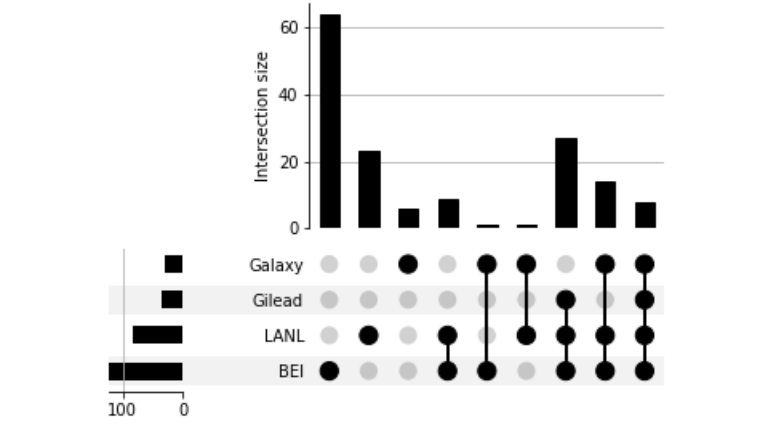

Supplement: media-3.pdf [file media-3.pdf]
